# Supplementary material for: The Intersection of Human Disturbance and Diel Activity, with Potential Consequences on Trophic Interactions
Source: PubMed Central journal article supplement (PMC6910683; doi:10.1371/journal.pone.0226418), 2019-12-13
Supplement: pone.0226418.s001.pdf [file pone.0226418.s001.pdf]

**S1 Table. Specific locations of camera traps in coastal Orange County, California, 2007–2016.**

| <u>Camera</u> | <u>Latitude</u> | <u>Longitude</u> |
|---------------|-----------------|------------------|
| AG CH         | 33.70846        | -117.67305       |
| AU TR         | 33.75832        | -117.70193       |
| BG_BR         | 33.60528        | -117.84944       |
| BG_GC         | 33.60344        | -117.83627       |
| BG_PCN        | 33.59948        | -117.84636       |
| BG_PPD        | 33.58766        | -117.85524       |
| BG_SJH1       | 33.61098        | -117.84168       |
| BG_WE         | 33.60451        | -117.8388        |
| BO SP         | 33.7223         | -117.70988       |
| BO TR         | 33.71725        | -117.67283       |
| CA CR         | 33.6275         | -117.78167       |
| CO MI         | 33.80553        | -117.7098        |
| CO TR         | 33.7606         | -117.71812       |
| DO CA         | 33.82803        | -117.67673       |
| DO CA3        | 33.82778        | -117.6775        |
| DR SP         | 33.73408        | -117.68108       |
| DR SP2        | 33.73369        | -117.68092       |
| EA MW2        | 33.79472        | -117.72917       |
| FR RO         | 33.79029        | -117.72311       |
| FU BR         | 33.75892        | -117.70265       |
| FU TR(BC)     | 33.61462        | -117.80197       |
| GY FO         | 33.85083        | -117.70494       |
| LA RO         | 33.79433        | -117.68388       |
| LI ME2        | 33.7425         | 117.67833        |
| LI SI         | 33.71722        | -117.67278       |
| LO EA         | 33.60694        | -117.79278       |
| LO WE2        | 33.8192         | -117.74698       |
| ME SP         | 33.72018        | -117.66135       |
| MI LI         | 33.63477        | -117.77322       |
| MO FR1        | 33.792          | -117.72055       |
| MO FR3        | 33.79163        | -117.71995       |
| MU DE         | 33.62928        | -117.76643       |
| OR LO         | 33.755          | -117.74178       |
| OV TR         | 33.82955        | -117.72083       |
| RA TR         | 33.739          | 117.67372        |
| RO CA2        | 33.70944        | 117.69444        |
| SE RI         | 33.62037        | -117.76752       |
| SO GY         | 33.83828        | -117.71252       |
| TH SI2        | 33.61444        | -117.78056       |
| TUR PND       | 33.60693        | -117.77972       |
| UP WE         | 33.83475        | -117.73025       |
| WE FO         | 33.6124         | -117.80047       |
| WE FO2        | 33.61336        | -117.8006        |
| WE SP         | 33.82678        | -117.74347       |
| WE TR1        | 33.8246         | -117.74387       |
| WE TR2        | 33.82988        | -117.74082       |
| WE TR3        | 33.83303        | -117.73563       |
| WE WI         | 33.8336         | -117.68335       |
