# Supplementary material for: The Intersection of Human Disturbance and Diel Activity, with Potential Consequences on Trophic Interactions
Source: PubMed Central journal article supplement (PMC6910683; doi:10.1371/journal.pone.0226418), 2019-12-13
Supplement: pone.0226418.s002.pdf [file pone.0226418.s002.pdf]

**S1 Fig. Active cameras 2007–2015.**

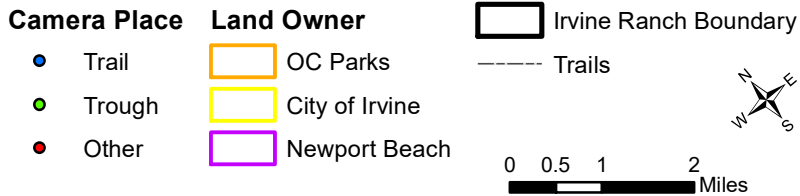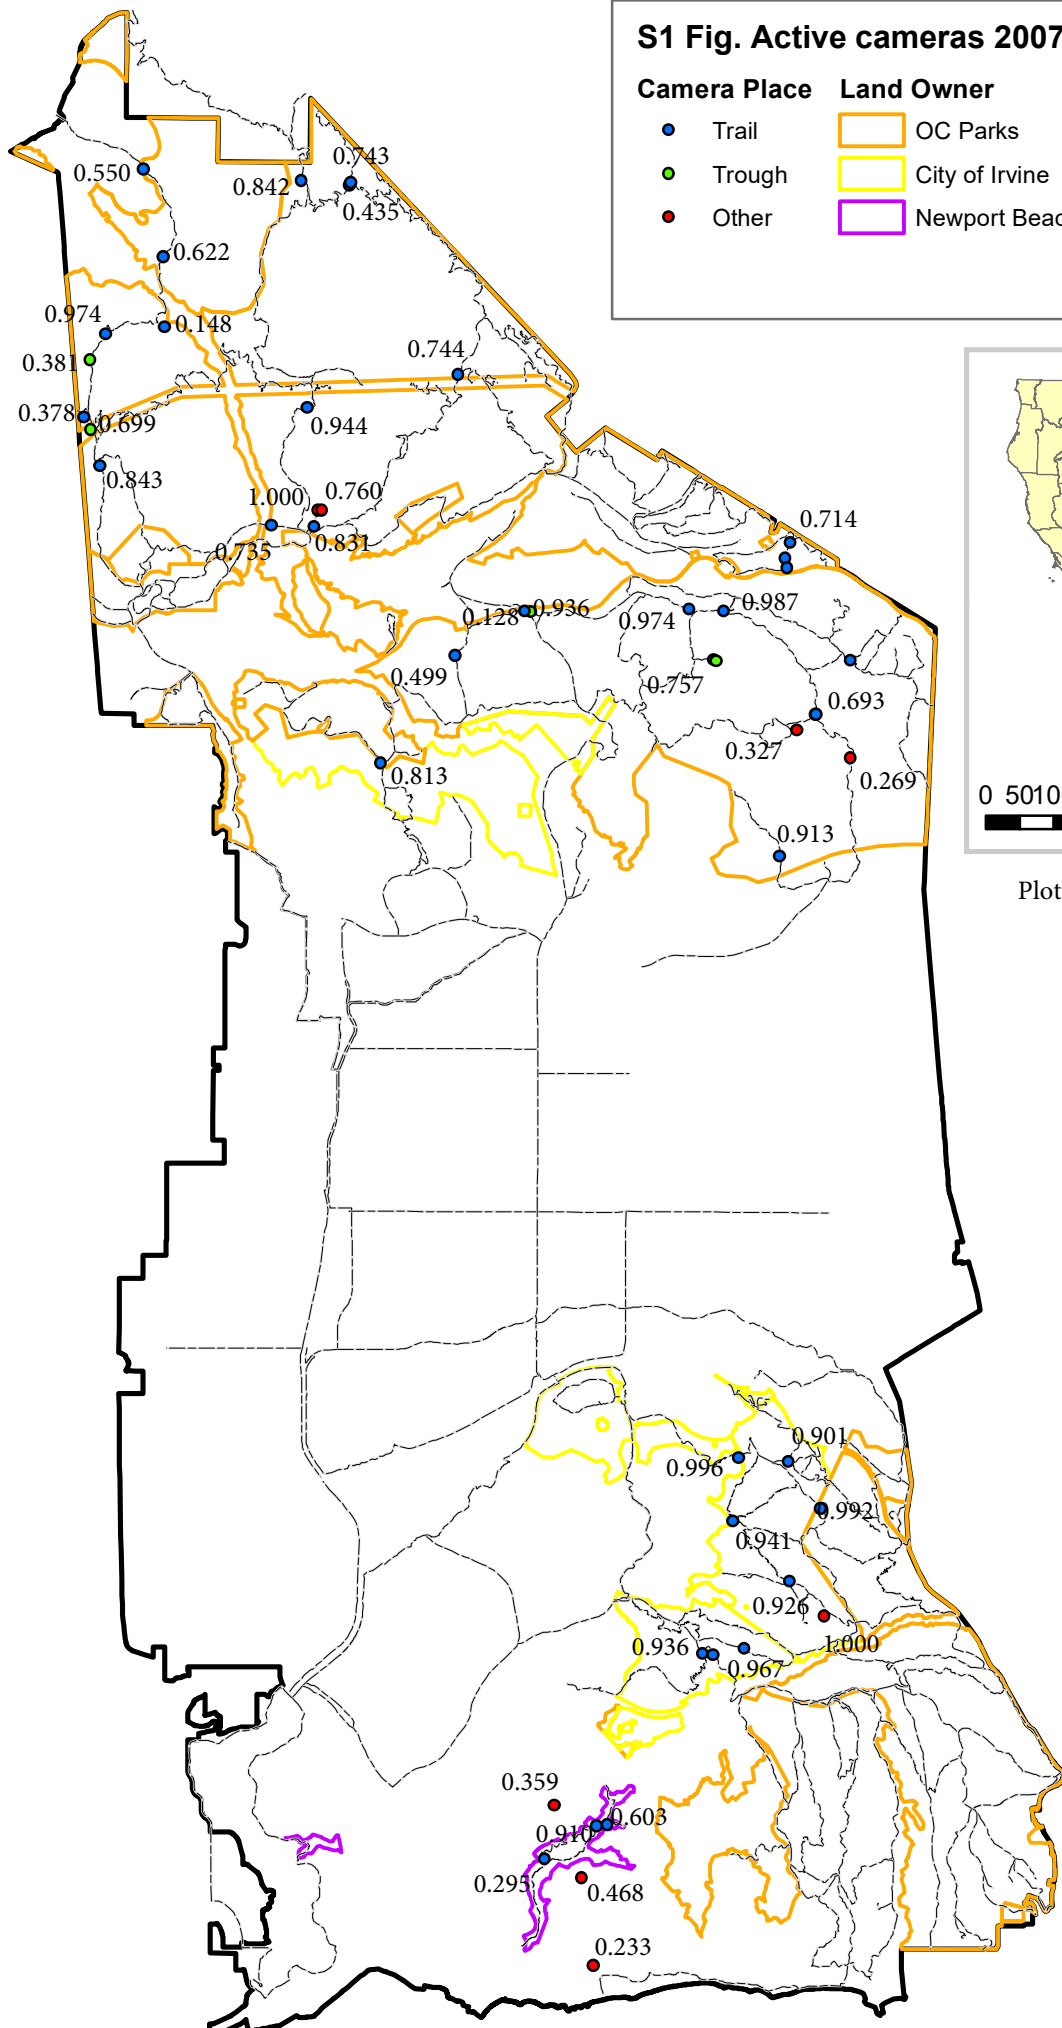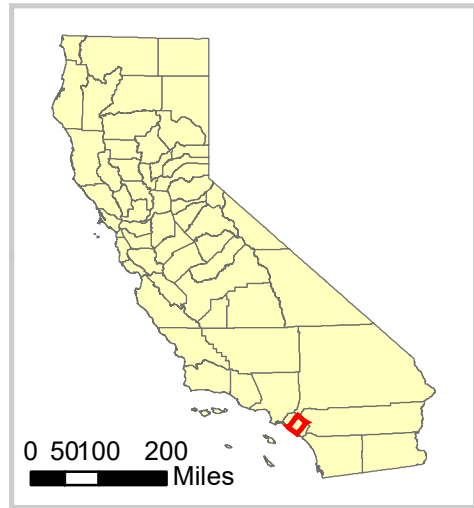

Plotted values = proportion of days with human disturbance.
