# Supplementary material for: The Intersection of Human Disturbance and Diel Activity, with Potential Consequences on Trophic Interactions
Source: PubMed Central journal article supplement (PMC6910683; doi:10.1371/journal.pone.0226418), 2019-12-13

**S3 Fig. Temporal distributions for human activity in this study. Note the distinct peak in mid to late morning as well as the near absence of activity after dark.**

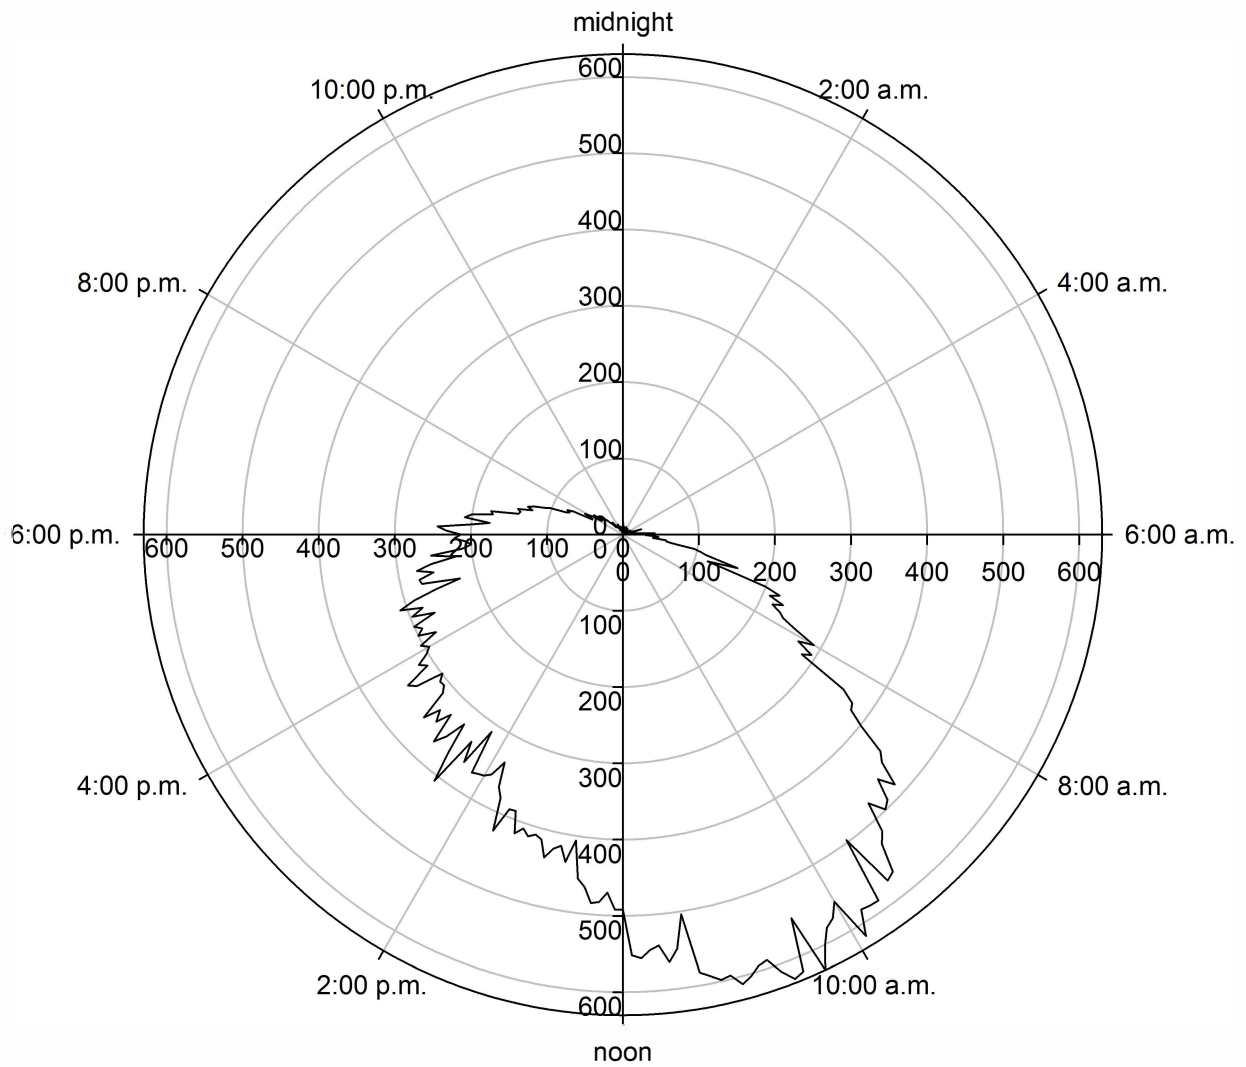

Supplement: pone.0226418.s004.pdf [file pone.0226418.s004.pdf]
