# Supplementary material for: The Intersection of Human Disturbance and Diel Activity, with Potential Consequences on Trophic Interactions
Source: PubMed Central journal article supplement (PMC6910683; doi:10.1371/journal.pone.0226418), 2019-12-13

S4 Fig. Temporal distributions for “non focal” species in this study.

disturbed

undisturbed

*Lynx rufus*

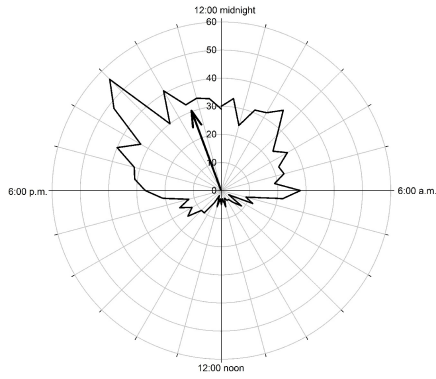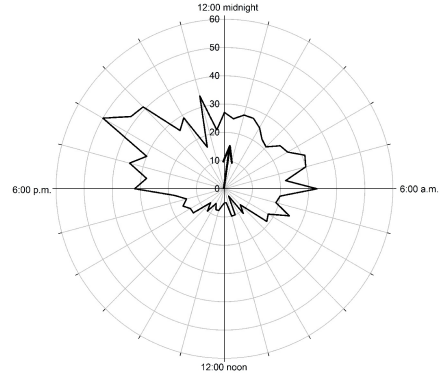

*Procyon lotor*

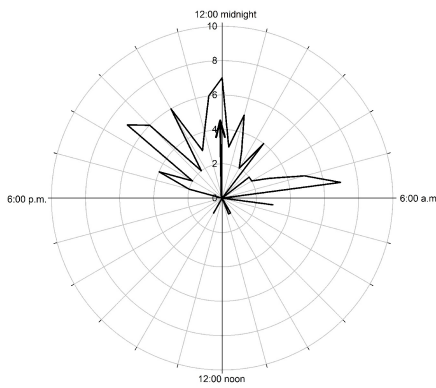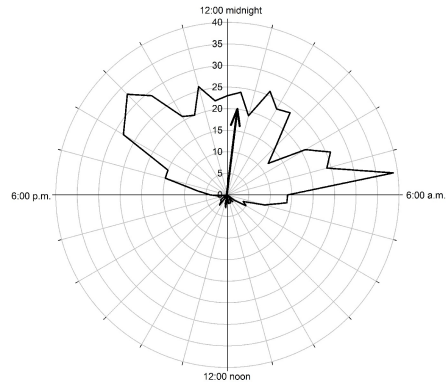

*Mephitis mephitis*

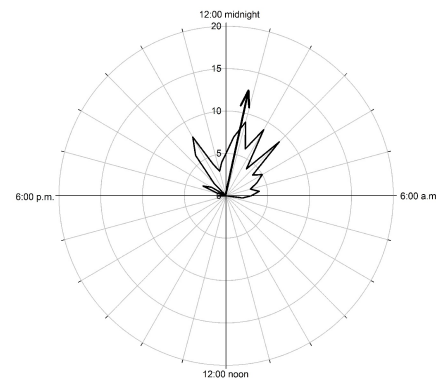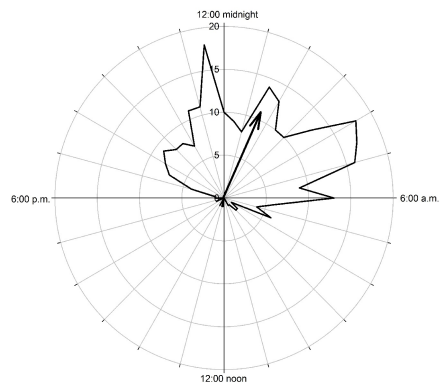

Supplement: pone.0226418.s005.pdf [file pone.0226418.s005.pdf]
